# Supplementary material for: Copepods key traits in diverse habitats of tropical waters
Source: Oxford University Press journal article supplement (doi:10.1093/plankt/fbab088), 2021-12-06
Supplement: 10-jpr-2021-047_revised-supplement_table_1_fbab088.docx [file 10-jpr-2021-047_revised-supplement_table_1_fbab088.docx]

**Supplement Table 1.** List of 139 copepod species and assigned traits with notes. References in numbers are in alphabet.

| **No** | **SCIENTIFIC NAME** | **TROPHIC** | **FEEDING** | **SPAWNING** | **MAXIMUM Size (mm) [6][43][56]** | **TROPHIC Ref.** | **FEEDING Ref.** | **SPAWNING Ref.** |
| --- | --- | --- | --- | --- | --- | --- | --- | --- |
| 1 | *Acartia (Acartia) danae* | Omnivore - Carnivore | Mixed | Broadcaster | 1.34 | [7];[43] | [5];[7];[22];  [44];[53] | [7];[19];[32] |
| 2 | *Acartia (Acartia) negligens* | Herbivore - Omnivore | Mixed | Broadcaster | 2.7 | [7];[43] | [5];[7];[22];  [53] | [7];[19];[12] |
| 3 | *Acartia (Odontacartia) amboinensis* | NA | Mixed (Current & Ambush) | Broadcaster | 1.47 | NA | [11] | [14];[9] |
| 4 | *Acartia (Odontacartia) erythraea* | Omnivore | Mixed (Current & Ambush) | Broadcaster | 1.5 | [42] | [11] | [14];[9] |
| 5 | *Acartia (Odontacartia) pacifica* | NA | Mixed (Current & Ambush) | Broadcaster | 1.35 | NA | [11] | [14];[9] |
| 6 | *Acrocalanus gibber* | NA | Active ambush | Broadcaster | 1.4 | NA | [11] | [47] |
| 7 | *Acrocalanus gracilis* | Herbivore - Omnivore | Active ambush | Broadcaster | 1.8 | [30];[42];[52] | [11];[52] | [18];[29] |
| 8 | *Acrocalanus longicornis* | Herbivore | Current feeding | Broadcaster | 1.55 | [52] | [52] | [13] |
| 9 | *Acrocalanus monachus* | Herbivore | Current feeding | NA | 1.1 | [52] | [52] | NA |
| 10 | *Aetideus giesbrechti* | Carnivore | Active ambush | Broadcaster | 2.2 | [6];[26] | [3];[6] | [32] |
| 11 | *Aetideus* sp | Carnivore | Active ambush | Broadcaster; uncertain | 2.2 | [6] | [6] | [6] NA |
| 12 | *Agetus flaccus* | Carnivore | Active ambush | Sac spawner | 1.67 | [6];[13];[26]  [44];[54] | [6];[12];[27] | [22];[6] |
| 13 | *Agetus limbatus* | Carnivore | Active ambush | Sac spawner | 1.89 | [6];[13];[26]  [44];[54] | [6];[12];[27] | [22];[6] |
| 14 | *Bestiolina* sp | NA | NA | NA |  | NA | NA | NA |
| 15 | *Calanopia elliptica* | Omnivore | Current feeding | Broadcaster; uncertain | 2.1 | [6] | [6] | [6] NA |
| 16 | *Calanopia minor* | NA | Active (current feeding) | NA | 1.4 | NA | [18];[35] | NA |
| 17 | *Calanus sinicus* | NA | Current feeding | Broadcaster | 3.6 | NA | [5] | [9] |
| 18 | *Calocalanus pavo* | Herbivore - Omnivore | Current feeding | Broadcaster | 1.4 | [26];[44] | [43];[40] | [13] |
| 19 | *Calocalanus pavoninus* | Herbivore - Omnivore | Current feeding | Broadcaster | 0.97 | [26] | [40] | [7] |
| 20 | *Calocalanus plumulosus* | Herbivore - Omnivore | Current feeding | NA | 1.34 | [26] | [43];[40] | NA |
| 21 | *Calocalanus styliremis* | Herbivore - Omnivore | Current feeding | Broadcaster | 0.95 | [26] | [40] | [7] |
| 22 | *Candacia bradyi* | Carnivore | Active ambush | NA | 2.1 | [6] | [11] | NA |
| 23 | *Candacia catula* | Carnivore | Piercing - Sucking | Broadcaster | 1.7 | [52] | [52] | [9] |
| 24 | *Candacia curta* | Carnivore | Piercing - Sucking | Broadcaster | 2.9 | [52] | [52] | [9] |
| 25 | *Candacia discaudata* | Carnivore | Active ambush | NA | 1.94 | [6] | [11] | NA |
| 26 | *Candacia pachydactyla* | Carnivore | Active ambush | Broadcaster | 3.4 | [52] | [11] | [13] |
| 27 | *Candacia truncata* | Carnivore | Piercing - Sucking | Broadcaster | 2.3 | [52] | [52] | [9] |
| 28 | *Canthocalanus pauper* | Herbivore | Current feeding | NA | 2.04 | [52] | [11] | NA |
| 29 | *Centropages furcatus* | Omnivore - Carnivore | Mixed | Broadcaster | 1.92 | [12];[43];[44] | [5];[12] | [19];[32] |
| 30 | *Centropages gracilis* | Omnivore | Mixed | Broadcaster | 2.16 | [52] | [11] | [19] |
| 31 | *Centropages longicornis* | Omnivore | Mixed | Broadcaster | 2 | [6] | [11] | [19] |
| 32 | *Centropages orsinii* | Omnivore | Mixed | Broadcaster | 1.17 | [2] | [11] | [19] |
| 33 | *Centropages sinensis* | Omnivore | Mixed | Broadcaster | 1.5 | [6] | [11] | [19] |
| 34 | *Centropages tenuiremis* | Omnivore | Mixed | Broadcaster | 2 | [42] | [11] | [19] |
| 35 | *Chiridius gracilis* | NA | Active ~~ambush~~ | Sac spawner | 3.1 | NA | [11] | [25] |
| 36 | *Chiridius poppei* | Omnivore | Cruise | Broadcaster | 2.45 | [8];[38] | [38] | [8] |
| 37 | *Clausocalanus arcuicornis* | Herbivore - Omnivore | Current feeding | Sac spawner | 1.62 | [26];[43];[44] | [41] | [46] |
| 38 | *Clausocalanus furcatus* | Herbivore - Omnivore | Current feeding | Sac spawner | 1.75 | [26];[45] | [41] | [32];[46] |
| 39 | *Clausocalanus pergens* | Herbivore - Omnivore | Cruise | Sac spawner | 1.1 | [26] | [41];[45] | [46] |
| 40 | *Clytemnestra scutellata* | NA | NA | Sac spawner | 1.12 | NA | NA | [14] |
| 41 | *Copilia mirabilis* | Carnivore | Active ambush | NA | 6.61 | [42] | [11] | NA |
| 42 | *Corycaeus crassiusculus* | NA | Active ambush | Sac spawner | 2 | NA | [11] | [14] |
| 43 | *Corycaeus* sp | Carnivore | Active ambush | Sac spawner; uncertain |  | [52] | [11] | [14] |
| 44 | *Corycaeus speciosus* | Carnivore | Active ambush | Sac spawner | 2.55 | [26];[45];[54] | [12];[27] | [22] |
| 45 | *Cosmocalanus darwinii* | Herbivore | Current feeding | NA | 2.58 | [52] | [52] | NA |
| 46 | *Ctenocalanus vanus* | Herbivore | Current feeding | Broadcaster | 1.95 | [6];[44] | [6] | [32] |
| 47 | *Dioithona rigida* | Omnivore - Detritivore | Active ambush | Sac spawner | 1 | [6] | [11] | [14] |
| 48 | *Distioculus minor* | Omnivore | Active ambush | Sac spawner | 1.74 | [30] | [30] | [22];[30] |
| 49 | *Ditrichocorycaeus andrewsi* | Carnivore | Active ambush | Sac spawner | 1.07 | [52] | [11] | [14];  This study |
| 50 | *Ditrichocorycaeus asiaticus* | Carnivore | Active ambush | Sac spawner | 1.4 | [52] | [11] | [14] |
| 51 | *Ditrichocorycaeus dahli* | Carnivore | Active ambush | Sac spawner | 1.21 | [52] | [11] | [14] |
| 52 | *Ditrichocorycaeus erythraeus* | Carnivore | Active ambush | Sac spawner | 1.12 | [52] | [11] | [14] |
| 53 | *Ditrichocorycaeus lubbocki* | Carnivore | Active ambush | Sac spawner | 1.03 | [52] | [11] | [14] |
| 54 | *Euchaeta concinna* | Carnivore | Siezing- Masticating | Sac spawner | 3.75 | [52] | [52] | [29] |
| 55 | *Euchaeta indica* | Carnivore | Siezing- Masticating | Sac spawner | 3 | [52] | [11];[52] | [29] |
| 56 | *Euchaeta longicornis* | Carnivore | Siezing-Masticating  Cruise / Current | Sac spawner | 3.32 | [52]; [26] | [26];[43]; [52] | [29] |
| 57 | *Euchaeta marina* | Carnivore | Cruise / Current | Sac spawner | 3.9 | [6];[8];[26]  ;[43] | [6] | [8];[10] |
| 58 | *Euchirella amoena* | NA | NA | Sac spawner | 4 | NA | NA | [29] |
| 59 | *Euterpina acutifrons* | Herbivore - Omnivore | Passive | Sac spawner | 0.86 | [10];[26];[45] | [11] | [22] |
| 60 | *Farranula carinata* | Carnivore | Cruise | Sac spawner | 0.98 | [9] | [16] | [22] |
| 61 | *Farranula concinna* | NA | Passive | Sac spawner | 1.04 | NA | [11] | [14] |
| 62 | *Farranula gibbula* | NA | Passive | Sac spawner | 1.1 | NA | [11] | [14] |
| 63 | *Farranula rostrata* | Carnivore | Cruise | Sac spawner | 0.9 | [9] | [16] | [22] |
| 64 | *Haloptilus longicornis* | Omnivore - Carnivore | Cruise | NA | 2.63 | [6];[8];[26] | [6] | NA |
| 65 | *Haloptilus ornatus* | Omnivore - Carnivore | Cruise | Sac spawner | 5.33 | [6];[8];[26] | [6] | [7] |
| 66 | *Heterorhabdus papilliger* | Carnivore | Current feeding | Broadcaster | 2.65 | [8];[26];[33] | [11] | [9] |
| 67 | *Kelleria* sp | NA | Passive | Sac spawner; uncertain |  | NA | [11] | [14] |
| 68 | *Labidocera acuta* | Carnivore | Active (current feeding) | Broadcaster | 3.6 | [42] | [11] | [11] |
| 69 | *Labidocera detruncata* | NA | Active (current feeding) | Broadcaster | 2.8 | NA | [35] | [11] |
| 70 | *Labidocera laevidentata* | NA | Active (current feeding) | Broadcaster | 2.36 | NA | [35] | [11] |
| 71 | *Labidocera minuta* | NA | Active (current feeding) | Broadcaster | 2.26 | NA | [35] | [11] |
| 72 | *Longipedia weberi* | NA | NA | Sac spawner; uncertain | 1 | NA | NA | This study |
| 73 | *Lubbockia squillimana* | Carnivore | Active ambush | Sac spawner | 2.5 | [6] | [6] | [22] |
| 74 | *Lucicutia flavicornis* | Herbivore - Omnivore | Current feeding | NA | 2.5 | [8];[26];[43]  ;[57] | [43] | This study |
| 75 | *Lucicutia ovalis* | Herbivore - Omnivore | Current feeding | NA | 2 | [8];[43];[57] | [43] | This study |
| 76 | *Macrosetella gracilis* | Herbivore - Omnivore | Passive | Sac spawner | 1.8 | [26] | [6] | [22] |
| 77 | *Mecynocera clausi* | Herbivore - Omnivore | Active (cruise) | Sac spawner; uncertain | 1.3 | [6];[26];[43]  ;[45] | [6];[11] | [6] NA |
| 78 | *Mesocalanus tenuicornis* | Herbivore - Omnivore | Current feeding | Broadcaster | 3.4 | [26];[57] | [4] | [32] |
| 79 | *Metacalanus aurivillii* | NA | NA | NA | 0.69 | NA | NA | NA |
| 80 | *Microsetella norvegica* | Omnivore - Detritivore | Cruise | Sac spawner | 0.76 | [1];[28];[36] | [28] | [22] |
| 81 | *Nannocalanus minor* | Herbivore - Omnivore | Current feeding | Broadcaster | 2.45 | [4];[26] | [4];[26];[43] | [32] |
| 82 | *Neocalanus gracilis* | Herbivore - Omnivore | Current feeding | Broadcaster | 4.4 | [4];[26] | [4];[26];[43] | [32] |
| 83 | *Oithona attenuata* | Omnivore - Detritivore | Active ambush | Sac spawner | 1.78 | [6] | [11] | [14] |
| 84 | *Oithona brevicornis* | Omnivore - Detritivore | Active ambush | Sac spawner | 0.79 | [17];[54] | [23];[24];[39]  ;[41] | [22] |
| 85 | *Oithona fallax* | Omnivore - Detritivore | Active ambush | Sac spawner | 1.01 | [6] | [11] | [14] |
| 86 | *Oithona nana* | Omnivore - Detritivore | Active ambush | Sac spawner | 0.95 | [17];[54] | [23];[24];[39]  ;[41] | [22] |
| 87 | *Oithona plumifera* | Omnivore - Detritivore | Active ambush | Sac spawner | 1.54 | [17];[54] | [23];[24];[39]  ;[41] | [22] |
| 88 | *Oithona robusta* | Omnivore - Detritivore | Active ambush | Sac spawner | 1.65 | [6] | [11] | [14] |
| 89 | *Oithona setigera* | Omnivore - Detritivore | Active ambush | Sac spawner | 2 | [17];[54] | [23];[24];[39]  ;[41] | [22] |
| 90 | *Oithona simplex* | Omnivore - Detritivore | Active ambush | Sac spawner | 0.47 | [6] | [11] | [14] |
| 91 | *Oithona tenuis* | Omnivore - Detritivore | Active ambush | Sac spawner | 1.37 | [17];[54] | [23];[24];[39]  ;[41] | [22] |
| 92 | *Oncaea clevei* | Omnivore (Detritus mainly) | Cruise | Sac spawner; uncertain | 0.76 | [6] | [6] | [6] NA |
| 93 | *Oncaea media* | Omnivore - Detritivore | Cruise | Sac spawner | 1 | [1];[36];[50]  ;[54] | [15];[39] | [22] |
| 94 | *Oncaea mediterranea* | Omnivore - Detritivore | Cruise | Sac spawner | 1.6 | [1];[36];[50]  ;[54] | [15];[39] | [22] |
| 95 | *Oncaea* sp | Omnivore | Cruise | Sac spawner; uncertain |  | [6] | [6] | [14] |
| 96 | *Oncaea venusta* | Omnivore - Detritivore | Cruise | Sac spawner | 1.7 | [1];[36];[50]  ;[54] | [15];[39] | [22] |
| 97 | *Onychocorycaeus agilis* | NA | Active ambush | Sac spawner | 1.4 | NA | [11] | [14] |
| 98 | *Onychocorycaeus catus* | Carnivore | Active ambush | Sac spawner | 1.18 | [2] | [11] | [14] |
| 99 | *Onychocorycaeus pacificus* | NA | Active ambush | Sac spawner | 1.22 | NA | [11] | [14] |
| 100 | *Paracalanus aculeatus* | Herbivore | Current feeding | Broadcaster | 1.45 | [52] | [11];[52] | [13] |
| 101 | *Paracalanus denudatus* | Herbivore - Omnivore | Current feeding | Broadcaster | 0.96 | [8] | [26];[40];[43]  ;[53] | [25] |
| 102 | *Paracalanus gracilis* | Herbivore - Omnivore | Current feeding | Broadcaster | 1.01 | [8];[26] | [26];[40];[43]  ;[52];[53] | [20];[21];[22]  ;[25] |
| 103 | *Paracalanus parvus* | Herbivore - Omnivore | Current feeding | Broadcaster | 1.4 | [6];[7] | [6] | [6];[7] |
| 104 | *Paraeuchaeta russelli* | Carnivore | Active [cruise] | Sac spawner | 4.38 | [48];[52] | [11];[52] | [29] |
| 105 | *Pareucalanus attenuatus* | Herbivore | Current feeding | Broadcaster; uncertain | 7.3 | [4];[6] | [4];[6];[43] | [6] NA |
| 106 | *Pareucalanus parki* | NA | NA | NA | 7.17 | NA | NA | NA |
| 107 | *Parvocalanus crassirostris* | Omnivore | Current feeding | Broadcaster | 0.82 | [30] | [5] | [8] |
| 108 | *Phaenna* sp | NA | Active ambush | Broadcaster; uncertain |  | NA | [11] | [9] |
| 109 | *Pleuromamma abdominalis* | Omnivore | Current feeding | Broadcaster | 4.5 | [8];[26];[55] | [31] | [32] |
| 110 | *Pleuromamma borealis* | Omnivore | Current feeding | Broadcaster | 2.5 | [8] | [31] | [32] |
| 111 | *Pleuromamma gracilis* | Omnivore | Current feeding | Broadcaster | 2.55 | [8];[43];[45] | [31] | [20];[32] |
| 112 | *Pleuromamma robusta* | Omnivore | Current feeding | NA | 4.7 | [52] | [11] | NA |
| 113 | *Pontellina plumata* | Carnivore | Active ambush | Broadcaster | 1.94 | [6];[35] | [6];[35] | [9] |
| 114 | *Pontellopsis macronyx* | NA | Active | NA | 2.1 | NA | [35] | NA |
| 115 | *Rhincalanus cornutus* | Herbivore - Omnivore | Current feeding | Broadcaster | 4.16 | [3];[43];[55] | [43] | [32] |
| 116 | *Rhincalanus nasutus* | Herbivore - Omnivore | Current feeding | Broadcaster | 6.1 | [3];[4];[43] | [4] | [20] |
| 117 | *Sapphirina metallina* | Carnivore | Cruise | Sac spawner | 3 | [6];[51] | [6];[51] | [21] |
| 118 | *Sapphirina nigromaculata* | Carnivore | Cruise | Sac spawner | 4.15 | [6];[51] | [6];[51] | [21] |
| 119 | *Scolecithricella longispinosa* | Omnivore - Detritivore | Current feeding | NA | 1.2 | [52] | [6];[11] | This study |
| 120 | *Scolecithricella nicobarica* | Omnivore - Detritivore | Current feeding | NA | 1.5 | [52] | [6];[11] | This study |
| 121 | *Scolecithrix bradyi* | Omnivore - Detritivore | Cruise | Broadcaster | 1.6 | [8];[34];[36]  ;[43] | [6] | [32] |
| 122 | *Scolecithrix danae* | Omnivore - Detritivore | Cruise | Sac/Broad; uncertain | 2.52 | [6];[8];[34]  ;[36];[43] | [6] | [6];[49] |
| 123 | *Scolecitrichopsis ctenopus* | NA | Active ambush | Broadcaster | 1.9 | NA | [11] | [9] |
| 124 | *Subeucalanus crassus* | Herbivore - Omnivore | Current feeding | Broadcaster; uncertain | 4.6 | [4];[43] | [4];[6];[43] | [14] |
| 125 | *Subeucalanus subcrassus* | NA | Current feeding | NA | 2.92 | NA | [11] | NA |
| 126 | *Subeucalanus subtenuis* | Herbivore | Current feeding | NA | 3.7 | [52] | [11] | NA |
| 127 | *Temora discaudata* | Omnivore | Current feeding | Broadcaster | 2.05 | [42] | [11] | [47] |
| 128 | *Temora turbinata* | Herbivore - Omnivore | NA | Broadcaster | 1.71 | [2];[42] | NA | [14] |
| 129 | *Temoropia mayumbaensis* | NA | NA | NA | 1.17 | NA | NA | NA |
| 130 | *Tortanus (Tortanus) gracilis* | Carnivore | NA | NA | 2.1 | [42] | NA | NA |
| 131 | *Triconia conifera* | Omnivore - Detritivore | Cruise | Sac spawner | 1.5 | [6];[37] | [6] | [6];[21] |
| 132 | *Triconia dentipes* | Omnivore - Detritivore | Cruise | Sac spawner | 0.57 | [6];[37] | [6] | [6];[21] |
| 133 | *Triconia minuta* | Omnivore - Detritivore | Cruise | Sac spawner | 0.76 | [6];[37] | [6] | [6];[21] |
| 134 | *Triconia similis* | Omnivore | Cruise | Sac spawner | 1.2 | [6];[37] | [6] | [6];[21] |
| 135 | *Undeuchaeta plumosa* | Carnivore | Current feeding | Sac spawner | 4.65 | [44] | [11] | [29] |
| 136 | *Undinula vulgaris* | Omnivore | Current feeding | Broadcaster | 3.25 | [2] | [11] | [29] |
| 137 | *Urocorycaeus furcifer* | Carnivore | Active ambush | Sac spawner; uncertain | 2.1 | [6];[57] | [6] | This study |
| 138 | *Urocorycaeus lautus* | Carnivore | Active ambush | Sac spawner; uncertain | 1.18 | [6] | [11] | This study |
| 139 | *Urocorycaeus longistylis* | Carnivore | Active ambush | Sac spawner | 3.04 | [44] | [11] | [14] |

**REFERENCES**

1. Alldredge, A. L. (1972) Abandoned larvacean houses: a unique food source in the pelagic environment. *Science*, **177**(4052), 885-887.
2. Anjusha, A. (eds) (2013) Trophic efficiency of plankton food webs: observations from the Gulf of Mannar and the Palk Bay, Southeast Coast of India. *Journal of Marine Systems*, **115**, 40-61.
3. Arashkevich, Y. G. (1969) The food and feeding of copepods in the northwestern. *Pacific. Oceanology*, **9**, 695-709.
4. Arcos, F., Fleminger, A., (1986) Distribution of ﬁlter-feeding calonoid copepods in the Eastern Equatorial Paciﬁc. *California Cooperative Oceanic Fisheries Investigation* Reports, **27**, 170–186.
5. Barton, A. D., Pershing, A. J., Litchman, E., Record, N. R., Edwards, K. F., Finkel, Z. V., Kiørboe, T. & Ward, B. A. (2013) The biogeography of marine plankton traits. *Ecology Letters*, **16**(4), 522-534.
6. Benedetti, F., Gasparini, S., & Ayata, S. D. (2016) Identifying copepod functional groups from species functional traits. *J. Plankton Res.*, **38**(1), 159-166.
7. Benedetti, F., Vogt, M., Righetti, D., Guilhaumon, F. and Ayata, S.D. (2018) Do functional groups of planktonic copepods differ in their ecological niches? *Journal of Biogeography*, **45**(3), 604-616.
8. Blaxter, J. H., Douglas, B., Tyler, P. A., & Mauchline, J. (1998) *The biology of calanoid copepods*. Academic Press.
9. Boxshall, G. A., & Halsey, S. H. (2004) *An introduction to copepod diversity*. Ray Society.
10. Broglio, E., Saiz, E., Calbet, A., Trepat, I., & Alcaraz, M. (2004) Trophic impact and prey selection by crustacean zooplankton on the microbial communities of an oligotrophic coastal area (NW Mediterranean Sea). *Aquat. Microb. Ecol.*, **35**(1), 65-78.
11. Brun, P., Payne, M. R., & Kiørboe, T. (2017) A trait database for marine copepods. *Earth System Science Data*, **9**(1), 99-113.
12. Calbet, A., & Agustí, S. (1999) Latitudinal changes of copepod egg production rates in Atlantic waters: temperature and food availability as the main driving factors. *Mar. Ecol.: Prog. Ser.*, **181**, 155-162.
13. Campelo, R. P. D. S. (eds) (2018) Small-scale distribution of the mesozooplankton in a tropical insular system. *Brazilian Journal of Oceanography*, **66**, 15-29.
14. Conway, D. V. (2012) Marine Zooplankton of Southern Britain-Part 2: Arachnida, Pycnogonida, Cladocera, Facetotecta, Cirripedia and Copepoda. *Occasional Publication of the Marine Biological Association* **26**.
15. Go, Y. B., Oh, B. C., & Terazaki, M. (1998) Feeding behavior of the poecilostomatoid copepods Oncaea spp. on chaetognaths. *Journal of Marine Systems*, **15**(1-4), 475-482.
16. Gophen, M., & Harris, R. P. (1981) Visual predation by a marine cyclopoid copepod, Corycaeus anglicus. *J. Mar. Biol. Assoc. U. K.*, **61**(2), 391-399.
17. Gonzalez, H. E., & Smetacek, V. (1994) The possible role of the cyclopoid copepod Oithona in retarding vertical flux of zooplankton faecal material. *Mar. Ecol.: Prog. Ser. Oldendorf*, **113**(3), 233-246.
18. Gusmão, L. F. M., & McKinnon, A. D. (2009) Acrocalanus gracilis (Copepoda: Calanoida) development and production in the Timor Sea. *J. Plankton Res.*, **31**(9), 1089-1100.
19. Hirst, A. G., & Bunker, A. J. (2003) Growth of marine planktonic copepods: global rates and patterns in relation to chlorophyll a, temperature, and body weight. *Limnol. Oceanogr.*, **48**(5), 1988-2010.
20. Hirst, A. G., & Kiørboe, T. (2002) Mortality of marine planktonic copepods: global rates and patterns. *Mar. Ecol.: Prog. Ser.*, **230**, 195-209.
21. Kiørboe, T., & Sabatini, M. (1994) Reproductive and life cycle strategies in egg-carrying cyclopoid and free-spawning calanoid copepods. *J. Plankton Res.*, **16**(10), 1353-1366.
22. Kiørboe, T., & Sabatini, M. (1995) Scaling of fecundity, growth and development in marine planktonic copepods. *Mar. Ecol.: Prog. Ser.*, **120**(1), 285-298.
23. Kiørboe, T., Andersen, A., Langlois, V. J., Jakobsen, H. H., & Bohr, T. (2009) Mechanisms and feasibility of prey capture in ambush-feeding zooplankton. *Proc. Natl. Acad. Sci. U. S. A.*, **106**(30), 12394-12399.
24. Kiørboe, T. (2011) How zooplankton feed: mechanisms, traits and trade‐offs. *Biological reviews*, **86**(2), 311-339.
25. Kosobokova, K. N., Hirche, H. J., & Hopcroft, R. R. (2007) Reproductive biology of deep-water calanoid copepods from the Arctic Ocean. *Mar. Biol.*, **151**(3), 919-934.
26. Kouwenberg, J. H. (1994) Copepod distribution in relation to seasonal hydrographics and spatial structure in the north-western Mediterranean (Golfe du Lion). *Estuarine, Coastal Shelf Sci.*, **38**(1), 69-90.
27. Landry, M. R., Lehner-Fournier, J. M., & Fagerness, V. L. (1985) Predatory feeding behavior of the marine cyclopoid copepod Corycaeus anglicus. *Mar. Biol.*, **85**(2), 163-169.
28. Maar, M., Visser, A. W., Nielsen, T. G., Stips, A., & Saito, H. (2006) Turbulence and feeding behaviour affect the vertical distributions of Oithona similis and Microsetella norwegica. *Mar. Ecol.: Prog. Ser.*, **313**, 157-172.
29. Mauchline, J. (1998) *Advances in Marine Biology.* Vol. **33**: The biology of calanoid copepods. Academic Press, London.
30. McKinnon, A. D., & Ayukai, T. (1996) Copepod egg production and food resources in Exmouth Gulf, Western Australia. *Mar. Freshwater Res.*, **47**(4), 595-603.
31. Moore, P. A., Fields, D. M., & Yen, J. (1999) Physical constraints of chemoreception in foraging copepods. *Limnol. Oceanogr.*, **44**(1), 166-177.
32. Niehoff, B. (2007) Life history strategies in zooplankton communities: The significance of female gonad morphology and maturation types for the reproductive biology of marine calanoid copepods. *Prog. Oceanogr.*, **74**(1), 1-47.
33. Nishida, S., & Ohtsuka, S. (1996) Specialized feeding mechanism in the pelagic copepod genus Heterorhabdus (Calanoida: Heterorhabdidae), with special reference to the mandibular tooth and labral glands. *Mar. Biol.*, **126**(4), 619-632.
34. Nishida, S., & Ohtsuka, S. (1997) Ultrastructure of the mouthpart sensory setae in mesopelagic copepods of the family Scolecitrichidae. *Plankton biology and ecology*, **44**(1), 81-90.
35. Ohtsuka, S., & Onbé, T. (1991) Relationship between mouthpart structures and in situ feeding habits of species of the family Pontellidae (Copepoda: Calanoida). *Mar. Biol.*, **111**(2), 213-225.
36. Ohtsuka, S., Kubo, N., Okada, M., & Gushima, K. (1993) Attachment and feeding of pelagic copepods on larvacean houses. *J. Oceanogr.*, **49**(1), 115-120.
37. Ohtsuka, S., Boettger Schnack, R., Okada, M., & Onbé, T (1996) In situ feeding habits of Oncaea (Copepoda: Poecilostomatoida) from the upper 250 m of the central Red Sea, with special reference to consumption of appendicularian houses. *Bulletin of Plankton Society of Japan,* **43**(2), 89-105.
38. Olsen, E. M., Jørstad, T., & Kaartvedt, S. (2000) The feeding strategies of two large marine copepods. *J. Plankton Res.*, **22**(8), 1513-1528.
39. Paffenhöfer, G. A. (1993) On the ecology of marine cyclopoid copepods (Crustacea, Copepoda). *J. Plankton Res.*, **15**(1), 37-55.
40. Paffenhöfer, G. A. (1998) On the relation of structure, perception and activity in marine planktonic copepods. *Journal of Marine Systems*, **15**(1-4), 457-473.
41. Paffenhöfer, G. A., & Mazzocchi, M. G. (2002) On some aspects of the behaviour of Oithona plumifera (Copepoda: Cyclopoida). *J. Plankton Res.*, **24**(2), 129-135.
42. Rakhesh, M., Raman, A. V., Kalavati, C., Subramanian, B. R., Sharma, V. S., Babu, E. S., & Sateesh, N. (2008) Zooplankton community structure across an eddy-generated upwelling band close to a tropical bay-mangrove ecosystem. *Mar. Biol.*, **154**(6), 953-972.
43. Razouls C., Desreumaux N., Kouwenberg J. and de Bovée F., 2005-2021 Biodiversity of Marine Planktonic Copepods (morphology, geographical distribution and biological data). Sorbonne University, CNRS. Available at <http://copepodes.obs-banyuls.fr/en>.
44. Richardson, A.J., Walne, A.W., John, A.W.G., Jonas, T.D., Lindley, J.A., Sims, D.W., Stevens, D. and Witt, M., (2006) Using continuous plankton recorder data. *Prog. Oceanogr.*, **68**(1), 27-74.
45. Swadling, K.M., (eds) (2013) Australian Marine Zooplankton: a taxonomic guide and atlas. *Hobart, TAS: University of Tasmania*.
46. Saiz, E. and Calbet, A., (1999) On the free-spawning reproductive behaviour of the copepod Clausocalanus lividus (Frost & Fleminger 1968). *J. Plankton Res.*, **21**(3).
47. Satapoomin, S., Nielsen, T.G. and Hansen, P.J., (2004) Andaman Sea copepods: spatio-temporal variations in biomass and production, and role in the pelagic food web. *Mar. Ecol.: Prog. Ser.*, **274**, 99-122.
48. Sano, M., Nishibe, Y., Tanaka, Y. and Nishida, S., (2015) Temporally sustained dietary niche partitioning in two mesopelagic copepod species and their mouthpart morphology. *Mar. Ecol.: Prog. Ser.*, **518**, 51-67.
49. Sazhina, L.I., (1987) Reproduction, growth, productivity of marine Copepoda. *Kiev: Naukoma Dumka, Russia*, **156**.
50. Steinberg, D.K., Silver, M.W., Pilskaln, C.H., Coale, S.L. and Paduan, J.B., (1994) Midwater zooplankton communities on pelagic detritus (giant larvacean houses) in Monterey Bay, California. *Limnol. Oceanogr.*, **39**(7), 1606-1620.
51. Takahashi, K., Ichikawa, T., Saito, H., Kakehi, S., Sugimoto, Y., Hidaka, K. and Hamasaki, K., (2013) Sapphirinid copepods as predators of doliolids: their role in doliolid mortality and sinking flux. *Limnol. Oceanogr.*, **58**(6), 1972-1984.
52. Timonin, A.G., (1971) The structure of plankton communities of the Indian Ocean. *Mar. Biol.*, **9**(4), 281-289.
53. Tiselius, P. and Jonsson, R., (1990) Foraging behaviour of six calanoid copepods: observations and hydrodynamic analysis. *Mar. Ecol.: Prog. Ser.*, **66**, 23-33.
54. Turner, J.T., Tester, P.A. and Conley, W.J., (1984) Zooplankton feeding ecology: predation by the marine cyclopoid copepod Corycaeus amazonicus F. Dahl upon natural prey. *J. Exp. Mar. Biol. Ecol.*, **84**(2), 191-202.
55. Wickstead, J.H., (1962) Food and feeding in pelagic copepods. *Proceedings of the zoological Society of London*, **139**(4), 545-555. Oxford, UK: Blackwell Publishing Ltd.
56. WoRMS Editorial Board (2021). World Register of Marine Species. Available from http://www.marinespecies.org at VLIZ. Accessed 2021-08-13. doi:10.14284/170
57. Yamaguchi, A., Watanabe, Y., Ishida, H., Harimoto, T., Furusawa, K., Suzuki, S., Ishizaka, J., Ikeda, T. and Mac Takahashi, M., (2002) Community and trophic structures of pelagic copepods down to greater depths in the western subarctic Pacific (WEST-COSMIC). *Deep Sea Research Part I: Oceanographic Research Papers*, **49**(6), 1007-1025.
