# Supplementary material for: Copepods key traits in diverse habitats of tropical waters
Source: Oxford University Press journal article supplement (doi:10.1093/plankt/fbab088), 2021-12-06
Supplement: 11-jpr-2021-047_revised-supplement_table_2_fbab088.pdf [file 11-jpr-2021-047_revised-supplement_table_2_fbab088.pdf]

**Supplement Table 2. Spearman corellation among funtional traits and environmental at four habitats based on abundance data. Notes C = carnivore, H = herbivores, O = omnivores, D = detritivore. Samples = 82; Layers (depth strata) = 4, but MKW = 2; times (day & night) = 2**

\*. Correlation is significant at the 0.05 level (2-tailed).

\*\*. Correlation is significant at the 0.01 level (2-tailed).

**Areas = UpW** Spearman's rho

|             | Times | Layers  | Broadcaster | Sac-spawner | NA-Repro | Ambush | Cruise | Current | Mixed  | NA-Feed | C      | H      | O     | OC     | OD     | OH    | Chl-a   | Temperature | Salinity |
|-------------|-------|---------|-------------|-------------|----------|--------|--------|---------|--------|---------|--------|--------|-------|--------|--------|-------|---------|-------------|----------|
| Times       |       |         |             |             |          |        |        |         |        |         |        |        |       |        |        |       |         |             |          |
| Layers      | -.033 |         |             |             |          |        |        |         |        |         |        |        |       |        |        |       |         |             |          |
| Broadcaster | .252  | -.306   |             |             |          |        |        |         |        |         |        |        |       |        |        |       |         |             |          |
| Sac-spawner | .315  | -.252   | .934**      |             |          |        |        |         |        |         |        |        |       |        |        |       |         |             |          |
| NA-Repro    | .205  | -.438*  | .949**      | .899**      |          |        |        |         |        |         |        |        |       |        |        |       |         |             |          |
| Ambush      | .362  | -.263   | .909**      | .956**      | .839**   |        |        |         |        |         |        |        |       |        |        |       |         |             |          |
| Cruise      | .346  | -.148   | .879**      | .965**      | .857**   | .913** |        |         |        |         |        |        |       |        |        |       |         |             |          |
| Current     | .378  | -.406   | .921**      | .921**      | .931**   | .881** | .900** |         |        |         |        |        |       |        |        |       |         |             |          |
| Mixed       | .349  | -.325   | .937**      | .921**      | .890**   | .866** | .910** | .894**  |        |         |        |        |       |        |        |       |         |             |          |
| NA-Feed     | .094  | -.349   | .945**      | .900**      | .974**   | .835** | .834** | .868**  | .877** |         |        |        |       |        |        |       |         |             |          |
| C           | .236  | -.193   | .869**      | .943**      | .861**   | .873** | .906** | .856**  | .945** | .878**  |        |        |       |        |        |       |         |             |          |
| H           | .212  | -.419   | .821**      | .847**      | .842**   | .828** | .802** | .898**  | .805** | .782**  | .809** |        |       |        |        |       |         |             |          |
| O           | -.087 | -.124   | .346        | .624*       | .396     | .569   | .374   | .310    | .286   | .629*   | .797** | .237   |       |        |        |       |         |             |          |
| OC          | .227  | -.531   | .871**      | .854**      | .868**   | .802** | .810** | .851**  | .940** | .876**  | .923** | .832** | .564  |        |        |       |         |             |          |
| OD          | .346  | -.213   | .917**      | .991**      | .892**   | .953** | .978** | .904**  | .919** | .891**  | .929** | .819** | .583  | .854** |        |       |         |             |          |
| OH          | .323  | -.325   | .948**      | .954**      | .959**   | .881** | .938** | .970**  | .950** | .928**  | .900** | .837** | .434  | .888** | .949** |       |         |             |          |
| Chl-a       | .110  | .612**  | .378        | .458*       | .257     | .455*  | .561** | .323    | .481   | .317    | .496*  | .291   | .137  | .394   | .496*  | .383  |         |             |          |
| Temperature | .032  | -.915** | .083        | .031        | .194     | .023   | -.084  | .181    | .008   | .109    | -.058  | .169   | .014  | .223   | -.018  | .109  | -.809** |             |          |
| Salinity    | -.039 | .901**  | -.158       | -.121       | -.274    | -.144  | .018   | -.254   | -.079  | -.214   | -.037  | -.222  | -.179 | -.334  | -.073  | -.179 | .699**  | -.934**     |          |

**Areas = MKW** Spearman's rho

|             | Times | Layers  | Broadcaster | Sac-spawner | NA-Repro | Ambush   | Cruise | Current  | Mixed    | NA-Feed  | C        | H        | O        | OC    | OD    | OH    | Chl-a | Temperature | Salinity |  |
|-------------|-------|---------|-------------|-------------|----------|----------|--------|----------|----------|----------|----------|----------|----------|-------|-------|-------|-------|-------------|----------|--|
| Times       |       |         |             |             |          |          |        |          |          |          |          |          |          |       |       |       |       |             |          |  |
| Layers      | .000  |         |             |             |          |          |        |          |          |          |          |          |          |       |       |       |       |             |          |  |
| Broadcaster | -.207 | -.293   |             |             |          |          |        |          |          |          |          |          |          |       |       |       |       |             |          |  |
| Sac-spawner | -.414 | .293    | .600        |             |          |          |        |          |          |          |          |          |          |       |       |       |       |             |          |  |
| NA-Repro    | .000  | -.098   | .771        | .771        |          |          |        |          |          |          |          |          |          |       |       |       |       |             |          |  |
| Ambush      | -.621 | .098    | .657        | .943**      | .657     |          |        |          |          |          |          |          |          |       |       |       |       |             |          |  |
| Cruise      | -.775 | -.447   | .800        | .600        | .800     | .800     |        |          |          |          |          |          |          |       |       |       |       |             |          |  |
| Current     | .207  | -.098   | .886*       | .543        | .771     | .486     | .600   |          |          |          |          |          |          |       |       |       |       |             |          |  |
| Mixed       | .296  | -.444   | .821        | .564        | .975**   | .410     | .500   | .872     |          |          |          |          |          |       |       |       |       |             |          |  |
| NA-Feed     | .000  | -.098   | .771        | .771        | 1.000**  | .657     | .800   | .771     | .975**   |          |          |          |          |       |       |       |       |             |          |  |
| C           | .000  | -.198   | .928**      | .638        | .928**   | .580     | .738   | .899*    | .975**   | .928**   |          |          |          |       |       |       |       |             |          |  |
| H           | .000  | -.198   | .928**      | .638        | .928**   | .580     | .738   | .899*    | .975**   | .928**   | 1.000**  |          |          |       |       |       |       |             |          |  |
| O           |       | 1.000** | -1.000**    | -1.000**    | -1.000** | -1.000** |        | -1.000** | -1.000** | -1.000** | -1.000** | -1.000** |          |       |       |       |       |             |          |  |
| OC          | .296  | -.444   | .821        | .564        | .975**   | .410     | .500   | .872     | 1.000**  | .975**   | .975**   | .975**   | -1.000** |       |       |       |       |             |          |  |
| OD          | -.207 | .098    | .771        | .943**      | .886*    | .886*    | .600   | .771     | .821     | .886*    | .812*    | .812*    | -1.000** | .821  |       |       |       |             |          |  |
| OH          | -.207 | -.293   | 1.000**     | .600        | .771     | .657     | .800   | .886*    | .821     | .771     | .928**   | .928**   | -1.000** | .821  | .771  |       |       |             |          |  |
| Chl-a       | .000  | -.293   | .600        | .714        | .886*    | .657     | .800   | .600     | .821     | .886*    | .725     | .725     | -1.000** | .821  | .829* | .600  |       |             |          |  |
| Temperature | -.207 | -.878*  | .600        | .200        | .486     | .371     | .800   | .371     | .667     | .486     | .522     | .522     | -1.000** | .667  | .371  | .600  | .657  |             |          |  |
| Salinity    | .420  | .891*   | -.203       | .145        | .000     | -.116    | -.632  | .145     | -.237    | .000     | -.044    | -.044    | 1.000**  | -.237 | .087  | -.203 | -.232 | -.841*      |          |  |

\*. Correlation is significant at the 0.05 level (2-tailed).

\*\* . Correlation is significant at the 0.01 level (2-tailed).

**Areas = OnSW** Spearman's rho

|             | Times | Layers  | Broadcaster | Sac-spawner | NA-Repro | Ambush | Cruise | Current | Mixed  | NA-Feed | C     | H       | O     | OC    | OD     | OH    | Chl-a | Temperature | Salinity |  |
|-------------|-------|---------|-------------|-------------|----------|--------|--------|---------|--------|---------|-------|---------|-------|-------|--------|-------|-------|-------------|----------|--|
| Times       |       |         |             |             |          |        |        |         |        |         |       |         |       |       |        |       |       |             |          |  |
| Layers      | -.146 |         |             |             |          |        |        |         |        |         |       |         |       |       |        |       |       |             |          |  |
| Broadcaster | -.051 | -.101   |             |             |          |        |        |         |        |         |       |         |       |       |        |       |       |             |          |  |
| Sac-spawner | .182  | .151    | .741**      |             |          |        |        |         |        |         |       |         |       |       |        |       |       |             |          |  |
| NA-Repro    | .318  | -.025   | .837**      | .889**      |          |        |        |         |        |         |       |         |       |       |        |       |       |             |          |  |
| Ambush      | .363  | .250    | .705**      | .914**      | .818**   |        |        |         |        |         |       |         |       |       |        |       |       |             |          |  |
| Cruise      | .195  | .638*   | .228        | .669*       | .494     | .673*  |        |         |        |         |       |         |       |       |        |       |       |             |          |  |
| Current     | .051  | -.275   | .903**      | .749**      | .921**   | .626*  | .273   |         |        |         |       |         |       |       |        |       |       |             |          |  |
| Mixed       | .     | -.688*  | .243        | .444        | .393     | .469   | -.175  | .343    |        |         |       |         |       |       |        |       |       |             |          |  |
| NA-Feed     | .182  | .021    | .820**      | .954**      | .964**   | .829** | .515   | .890**  | .452   |         |       |         |       |       |        |       |       |             |          |  |
| C           | .051  | -.211   | .374        | .745**      | .618*    | .578*  | .637*  | .593*   | .695*  | .727**  |       |         |       |       |        |       |       |             |          |  |
| H           | .285  | -.667*  | .291        | .396        | .544     | .352   | -.310  | .560*   | .879** | .511    | .594* |         |       |       |        |       |       |             |          |  |
| O           | .301  | .051    | .448        | .523        | .532     | .716*  | .387   | .460    | .406   | .505    | .523  | .418    |       |       |        |       |       |             |          |  |
| OC          | .     | -.212   | -.176       | .126        | .075     | .167   | -.054  | -.008   | .782*  | .084    | .377  | .678*   | .029  |       |        |       |       |             |          |  |
| OD          | .318  | .166    | .736**      | .975**      | .921**   | .929** | .609*  | .741**  | .427   | .954**  | .635* | .423    | .523  | .109  |        |       |       |             |          |  |
| OH          | -.091 | -.075   | .969**      | .786**      | .860**   | .702** | .375   | .934**  | .351   | .865**  | .620* | .418    | .624* | -.050 | .760** |       |       |             |          |  |
| Chl-a       | .318  | .443    | .046        | .457        | .307     | .418   | .662*  | .015    | -.343  | .336    | .099  | -.192   | -.037 | -.159 | .468   | .088  |       |             |          |  |
| Temperature | .499  | -.774** | .108        | .054        | .236     | .079   | -.368  | .262    | .644   | .168    | .310  | .654*   | .532  | .109  | .082   | .127  | -.279 |             |          |  |
| Salinity    | -.409 | .786**  | .004        | -.057       | -.227    | .034   | .511   | -.174   | -.731* | -.182   | -.229 | -.715** | -.174 | -.261 | -.097  | -.063 | .168  | -.892**     |          |  |

\*. Correlation is significant at the 0.05 level (2-tailed).

\*\* . Correlation is significant at the 0.01 level (2-tailed).

**Areas = OSW** Spearman's

|             | Times | Layers  | Broadcaster | Sac-spawner | NA-Repro | Ambush | Cruise | Current | Mixed  | NA-Feed | C      | H      | O      | OC     | OD     | OH    | Chl-a   | Temperature | Salinity |  |
|-------------|-------|---------|-------------|-------------|----------|--------|--------|---------|--------|---------|--------|--------|--------|--------|--------|-------|---------|-------------|----------|--|
| Times       |       |         |             |             |          |        |        |         |        |         |        |        |        |        |        |       |         |             |          |  |
| Layers      | .000  |         |             |             |          |        |        |         |        |         |        |        |        |        |        |       |         |             |          |  |
| Broadcaster | .256  | -.258   |             |             |          |        |        |         |        |         |        |        |        |        |        |       |         |             |          |  |
| Sac-spawner | .270  | -.101   | .931**      |             |          |        |        |         |        |         |        |        |        |        |        |       |         |             |          |  |
| NA-Repro    | .301  | -.236   | .946**      | .945**      |          |        |        |         |        |         |        |        |        |        |        |       |         |             |          |  |
| Ambush      | .252  | -.025   | .911**      | .928**      | .897**   |        |        |         |        |         |        |        |        |        |        |       |         |             |          |  |
| Cruise      | .148  | .067    | .771**      | .857**      | .846**   | .766** |        |         |        |         |        |        |        |        |        |       |         |             |          |  |
| Current     | .256  | -.236   | .993**      | .932**      | .950**   | .911** | .778** |         |        |         |        |        |        |        |        |       |         |             |          |  |
| Mixed       | .133  | -.057   | .843**      | .879**      | .876**   | .880** | .788** | .852**  |        |         |        |        |        |        |        |       |         |             |          |  |
| NA-Feed     | .301  | -.246   | .953**      | .952**      | .991**   | .894** | .830** | .953**  | .868** |         |        |        |        |        |        |       |         |             |          |  |
| C           | .206  | -.239   | .932**      | .898**      | .937**   | .849** | .818** | .936**  | .844** | .927**  |        |        |        |        |        |       |         |             |          |  |
| H           | .153  | -.264   | .911**      | .906**      | .890**   | .882** | .765** | .921**  | .847** | .899**  | .891** |        |        |        |        |       |         |             |          |  |
| O           | .079  | -.238   | .894**      | .850**      | .853**   | .823** | .744** | .877**  | .815** | .840**  | .902** | .805** |        |        |        |       |         |             |          |  |
| OC          | -.057 | -.224   | .891**      | .880**      | .860**   | .856** | .627** | .871**  | .908** | .868**  | .813** | .855** | .737** |        |        |       |         |             |          |  |
| OD          | .283  | -.056   | .913**      | .978**      | .928**   | .949** | .835** | .914**  | .874** | .943**  | .850** | .894** | .790** | .870** |        |       |         |             |          |  |
| OH          | .256  | -.229   | .989**      | .933**      | .950**   | .915** | .781** | .998**  | .857** | .951**  | .940** | .919** | .880** | .870** | .915** |       |         |             |          |  |
| Chl-a       | .084  | .724**  | .023        | .178        | .049     | .262   | .129   | .012    | .169   | .056    | -.023  | .042   | .045   | .105   | .239   | .014  |         |             |          |  |
| Temperature | .082  | -.828** | .001        | -.134       | -.011    | -.228  | -.256  | -.005   | -.126  | -.016   | .008   | -.018  | -.043  | -.079  | -.205  | -.003 | -.777** |             |          |  |
| Salinity    | -.080 | .864**  | -.151       | .001        | -.150    | .085   | .177   | -.137   | -.062  | -.164   | -.140  | -.166  | -.142  | -.080  | .052   | -.132 | .633**  | -.824**     |          |  |

\*. Correlation is significant at the 0.05 level (2-tailed).

\*\* . Correlation is significant at the 0.01 level (2-tailed).
